# Supplementary material for: Dengue Outbreak Prediction Based on Artificial Neural Networking Model Using Climatic Parameters
Source: Research Square preprint supplement (doi:10.21203/rs.3.rs-86587/v1), 2020-10-08
Supplement: Supplementary file 1 [file fd60debc632e502fb94ea4b2.docx]

Table 4. ANN Prediction Equations of the model

| *A1* = 2.83994 -0.93997 P + 1.750908 T -0.3375 Rh |
| --- |
| *A2* = 0.669594 + 1.133982 P + 0.920504 T -3.15984 Rh |
| *A3*= 0.28217 - 5.30229 P - 1.71685 T - 2.23958 Rh |
| *A4*= 2.156136 + 4.628453 P - 4.25897 T - 2.84179 Rh |
| *A5* = 1.524102 + 0.349226 P - 2.45992 T + 5.847645 Rh |
| *B1* = - 2.34544 |
| *B2* = 2.83967 |
| *B3* = 2.202405 |
| *B4* = - 2.15364 |
| *B5* = 2.319992 |
| *C1 =* -2.60774 *+ B1 + B2 + B3 + B4 + B5* |
| *Dn* = |
